# Supplementary material
Source: PubMed Central journal article supplement (PMC1820471)

Supplemental Fig. S2 - Babbe et al.

**A**

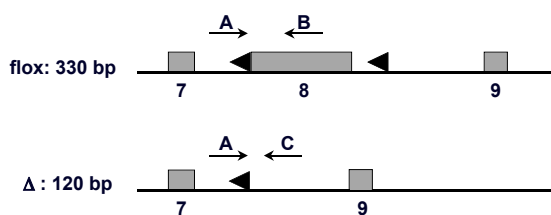

**B**

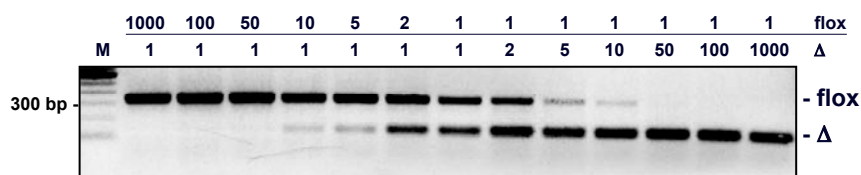

**C**

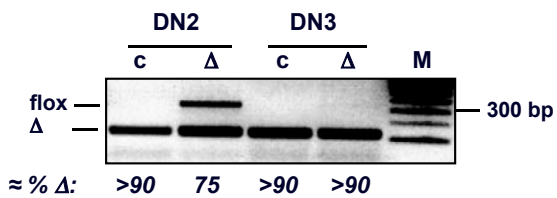

**D**

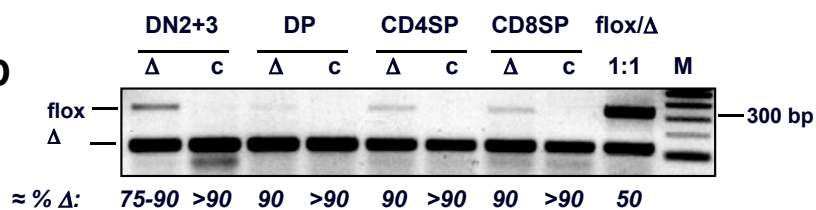

**E**

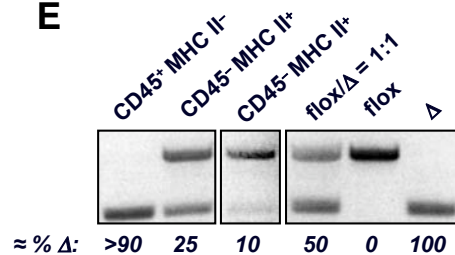

**F**

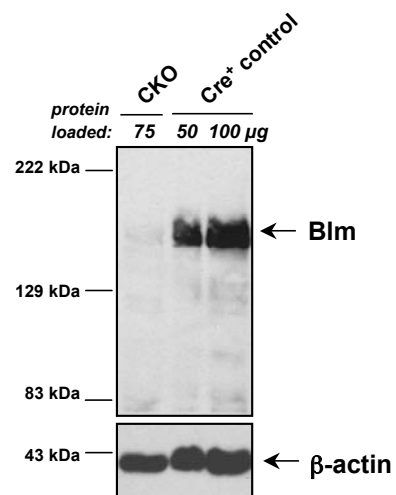

Supplemental Fig. S3 - Babbe et al.

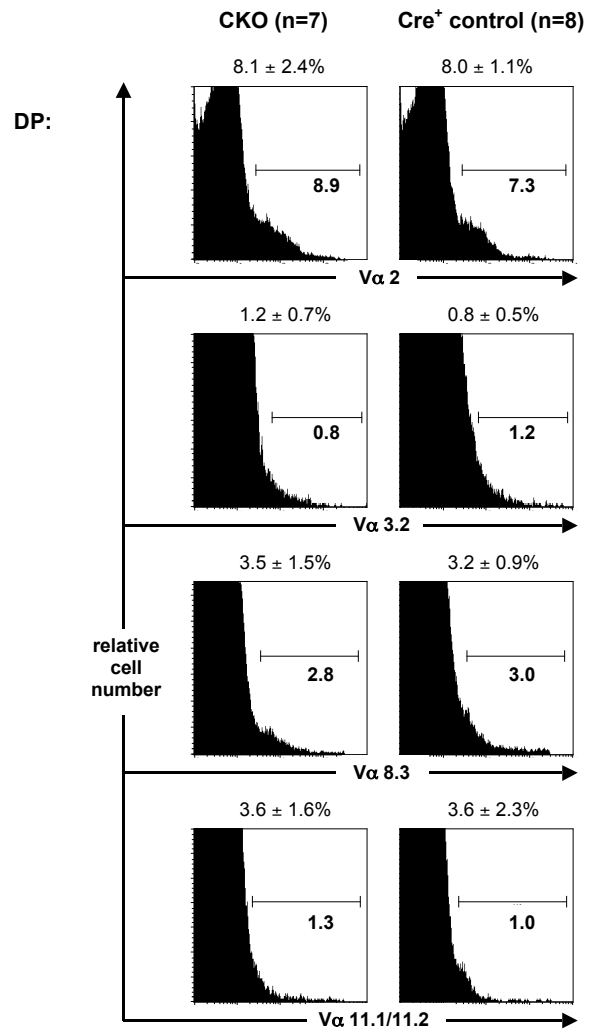

Supplemental Fig. S4 - Babbe et al.

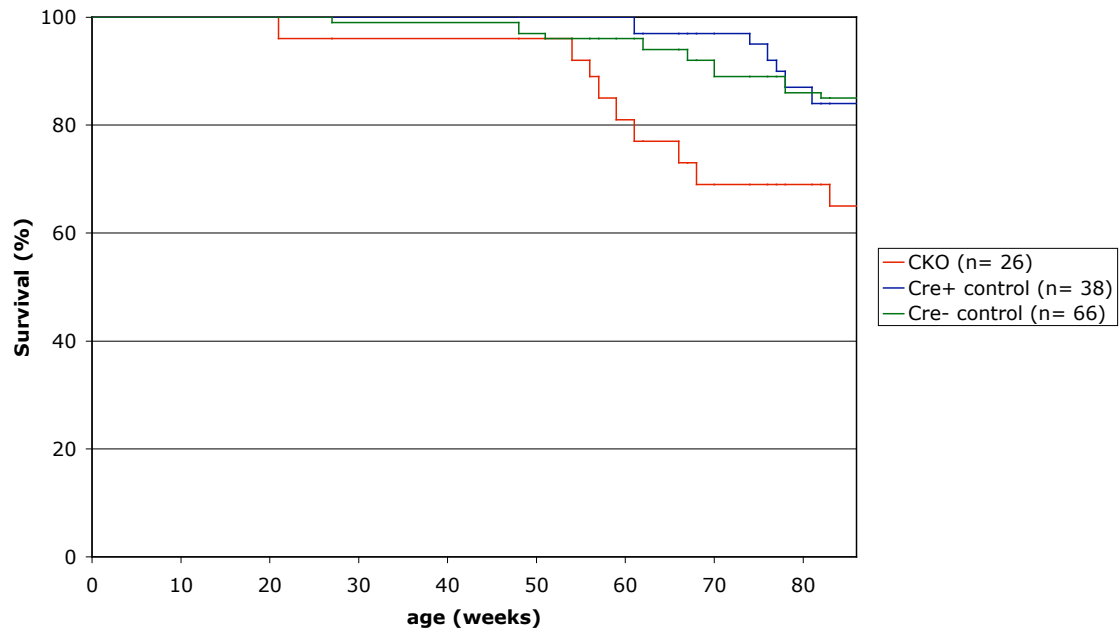

Supplement: molcellb_27_5_1947__1.pdf [file molcellb_27_5_1947__1.pdf]
